# Supplementary material
Source: Springer Nature journal article supplement (https://www.springermedizin.de/resource/supplementary/12879_2011_1941_MOESM2_ESM.pdf/9443414)

Prevalence (%)

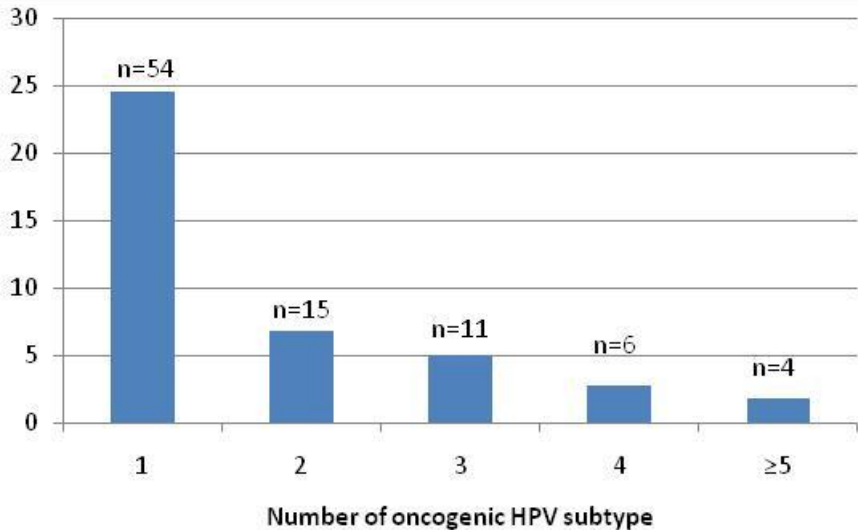

Supplement: MOESM2 [file 9443414]
